# Supplementary figures and images for: Trueness evaluation and verification of inter-assay agreement of serum folate measuring systems
Source: publisher site journal article supplement (doi:10.1515/cclm-2019-0928), 2020-01-11

Supplemental Figure 2

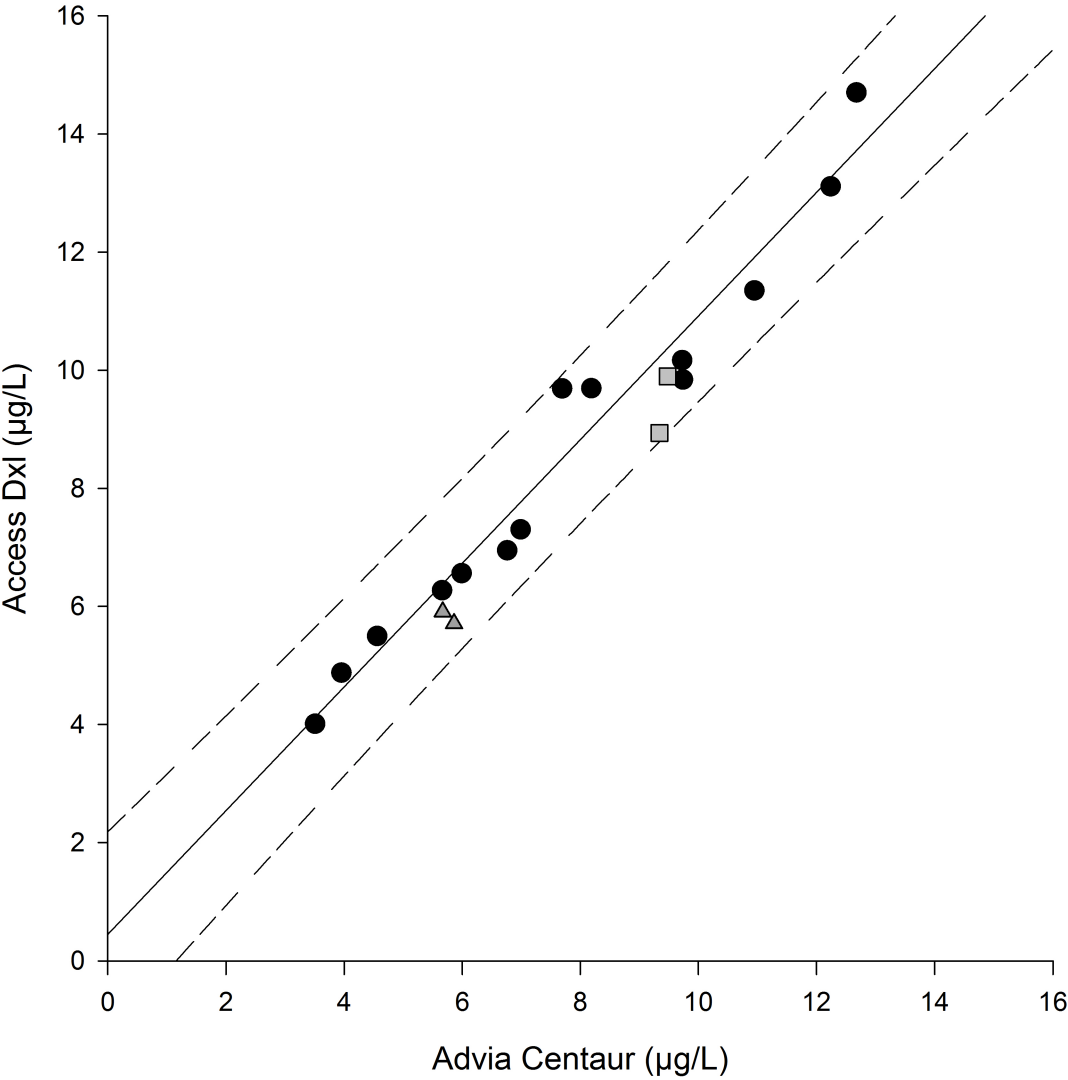

Supplement: Supplementary file 1 [file cclm-2019-0928_suppl.zip]
